# Supplementary material for: A Low-Activity Polymorphic Variant of Human NEIL2 DNA Glycosylase
Source: MDPI journal article supplement (doi:10.3390/ijms23042212), 2022-02-17
Supplement: s1 [file s1]

## Supporting Information for

Kakhkharova *et al.*, A low-activity polymorphic variant of human NEIL2 DNA glycosylase

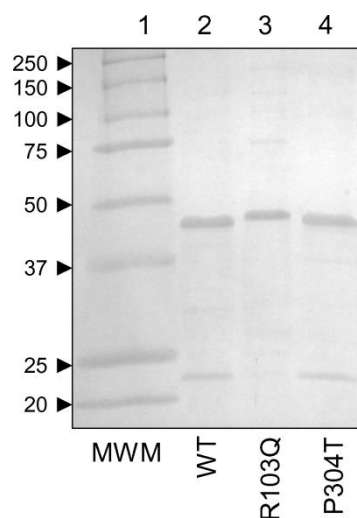

**Fig. S2.** SDS-polyacrylamide gel stained with InstantBlue Ultrafast Protein Stain (Sigma-Aldrich) showing the preparations of hNEIL2 proteins (lane 2, wild-type; lane 3, R103Q; lane 4, P304T). MWM, molecular weight markers; the weights are indicated by arrowheads.
