# Supplementary material for: A Low-Activity Polymorphic Variant of Human NEIL2 DNA Glycosylase
Source: Int J Mol Sci. 2022 Feb 17;23(4):2212. doi: 10.3390/ijms23042212 (PMC8879280; doi:10.3390/ijms23042212)
Supplement: Supplementary file 1 [file ijms-23-02212-s001.zip › Table S1.xlsx]

## Sheet: Лист1
dbSNP rs#	AA position	Reference AA	Variant AA	Predicted effect
				MutationTaster	FATHMM	Mutation Assessor	PolyPhen-2	Provean
rs1254976499	1	M	K	TRUE	DAMAGING		deleterious	Neutral
rs759229743	1	M	V	TRUE	TOLERATED		deleterious	Neutral
rs546439849	3	E	K	TRUE	DAMAGING	medium	deleterious	Neutral
rs764887602	4	G	V	TRUE	DAMAGING	medium	deleterious	Deleterious
rs1475363413	4	G	R	TRUE	DAMAGING	medium	deleterious	Deleterious
rs767098410	5	P	R	TRUE	DAMAGING	low	deleterious	Deleterious
rs1296396839	10	F	C	TRUE	DAMAGING	medium	deleterious	Deleterious
rs1233918298	11	H	Q	FALSE	TOLERATED	low	deleterious	Neutral
rs753102938	12	H	D	FALSE	TOLERATED	low	deleterious	Neutral
rs141715251	12	H	R	FALSE	TOLERATED	low	deleterious	Neutral
rs1233213008	13	L	F	FALSE	DAMAGING	medium	deleterious	Neutral
rs146251623	14	V	F	FALSE	TOLERATED	low	deleterious	Neutral
rs148425557	16	P	T	TRUE	TOLERATED	low	neutral	Neutral
rs781188575	16	P	R	TRUE	TOLERATED	low	deleterious	Deleterious
rs1248892717	20	Q	K	TRUE	DAMAGING	low	neutral	Neutral
rs369859419	20	Q	P	TRUE	DAMAGING	low	deleterious	Neutral
rs142586380	21	Q	E	FALSE	TOLERATED	low	neutral	Neutral
rs376675735	22	V	L	TRUE	TOLERATED	medium	deleterious	Neutral
rs772783828	24	K	T	FALSE	TOLERATED	low	neutral	Neutral
rs1022765349	24	K	N	FALSE	DAMAGING	low	deleterious	Neutral
rs368781768	25	T	I	FALSE	TOLERATED	low	deleterious	Neutral
rs765827393	26	G	R	TRUE	DAMAGING	medium	deleterious	Deleterious
rs150931138	26	G	A	TRUE	DAMAGING	medium	deleterious	Neutral
rs1309691938	27	G	C	TRUE	DAMAGING	low	deleterious	Deleterious
rs928400192	27	G	D	TRUE	DAMAGING	low	deleterious	Deleterious
rs372217539	29	S	R	FALSE	TOLERATED	medium	deleterious	Neutral
rs1270167502	32	L	V	FALSE	TOLERATED	low	deleterious	Neutral
rs139439505	35	A	T	FALSE	TOLERATED	neutral	neutral	Neutral
rs144214233	36	S	R	FALSE	TOLERATED	low	deleterious	Neutral
rs1441877618	36	S	N	FALSE	TOLERATED	low	neutral	Neutral
rs1007299808	37	L	R	FALSE	DAMAGING	low	deleterious	Neutral
rs768520252	37	L	V	FALSE	TOLERATED	low	neutral	Neutral
rs1425796188	38	Q	K	FALSE	TOLERATED	low	neutral	Neutral
rs908809196	39	S	Y	FALSE	TOLERATED	low	deleterious	Neutral
rs772916971	43	Q	H	FALSE	TOLERATED	medium	neutral	Neutral
rs974222722	45	T	S	FALSE	TOLERATED	low	neutral	Neutral
rs200789344	46	Q	K	TRUE	DAMAGING	low	neutral	Neutral
rs780809334	48	H	R	TRUE	DAMAGING	medium	deleterious	Deleterious
rs770482648	48	H	Y	TRUE	DAMAGING	medium	deleterious	Neutral
rs371715771	52	L	F	TRUE	DAMAGING	medium	deleterious	Neutral
rs1217488023	52	L	I	TRUE	DAMAGING	medium	deleterious	Neutral
rs774874068	53	F	L	TRUE	TOLERATED	low	deleterious	Neutral
rs762261035	54	L	R	TRUE	DAMAGING	medium	deleterious	Neutral
rs1267893012	55	R	T	FALSE	DAMAGING	low	deleterious	Neutral
rs772443957	56	F	L	TRUE	DAMAGING	medium	deleterious	Neutral
rs773501966	58	L	V	FALSE	TOLERATED	neutral	neutral	Neutral
rs761026083	59	D	H	FALSE	DAMAGING	low	neutral	Neutral
rs1394154186	62	M	V	FALSE	TOLERATED	low	neutral	Neutral
rs766497491	63	G	R	FALSE	TOLERATED	neutral	neutral	Neutral
rs1429329117	64	P	L	FALSE	TOLERATED	neutral	neutral	Neutral
rs759504559	66	G	S	FALSE	TOLERATED	low	neutral	Neutral
rs1443629957	67	S	T	FALSE	TOLERATED	low	neutral	Neutral
rs765357911	68	S	C	FALSE	DAMAGING	low	deleterious	Neutral
rs35400293	69	P	A	FALSE	TOLERATED	low	deleterious	Neutral
rs8191611	70	T	S	FALSE	TOLERATED	neutral	neutral	Neutral
rs889840627	72	E	Q	FALSE	TOLERATED	low	neutral	Neutral
rs371264329	73	P	S	FALSE	TOLERATED	low	neutral	Neutral
rs756979497	74	P	L	FALSE	TOLERATED	neutral	neutral	Neutral
rs1489403931	75	Q	K	FALSE	TOLERATED	low	neutral	Neutral
rs780674400	76	K	N	FALSE	TOLERATED	low	deleterious	Neutral
rs1440029890	77	E	Q	FALSE	TOLERATED	low	deleterious	Neutral
rs1008723742	78	V	M	FALSE	TOLERATED	neutral	neutral	Neutral
rs1019614582	78	V	A	FALSE	TOLERATED	neutral	neutral	Neutral
rs1323071803	80	K	T	FALSE	TOLERATED	low	neutral	Neutral
rs149163749	81	E	D	FALSE	TOLERATED	low	neutral	Neutral
rs147850029	83	A	D	FALSE	TOLERATED	low	neutral	Neutral
rs1164365431	84	A	P	FALSE	TOLERATED	neutral	deleterious	Neutral
rs867942520	84	A	V	FALSE	TOLERATED	neutral	neutral	Neutral
rs773624631	86	P	A	FALSE	TOLERATED	neutral	neutral	Neutral
rs1279538707	88	Q	E	FALSE	TOLERATED	low	neutral	Neutral
rs747314322	88	Q	R	FALSE	TOLERATED	low	neutral	Neutral
rs968976504	89	V	A	FALSE	TOLERATED	neutral	neutral	Neutral
rs1281547931	90	G	R	FALSE	TOLERATED	neutral	deleterious	Neutral
rs776751149	90	G	E	FALSE	TOLERATED	neutral	neutral	Neutral
rs140428451	91	E	D	FALSE	TOLERATED	neutral	neutral	Neutral
rs1336974776	93	S	T	FALSE	TOLERATED	low	neutral	Neutral
rs374346540	93	S	R	FALSE	TOLERATED	low	neutral	Neutral
rs751408660	94	G	E	FALSE	TOLERATED	low	deleterious	Neutral
rs764096891	94	G	R	FALSE	TOLERATED	neutral	neutral	Neutral
rs935327866	95	Q	H	FALSE	TOLERATED	low	deleterious	Neutral
rs959855719	97	T	A	FALSE	TOLERATED	low	neutral	Neutral
rs1206358982	97	T	I	FALSE	TOLERATED	neutral	neutral	Neutral
rs759811036	98	L	V	FALSE	TOLERATED	neutral	neutral	Neutral
rs145650056	98	L	P	FALSE	TOLERATED	neutral	neutral	Neutral
rs891423673	99	D	A	FALSE	TOLERATED	low	neutral	Neutral
rs961676307	100	G	R	FALSE	TOLERATED	low	neutral	Neutral
rs755730474	100	G	V	FALSE	TOLERATED	low	neutral	Neutral
rs8191613	103	R	Q	FALSE	TOLERATED	neutral	neutral	Neutral
rs8191612	103	R	W	FALSE	DAMAGING	low	deleterious	Neutral
rs368410610	104	S	F	FALSE	DAMAGING	low	deleterious	Neutral
rs559032217	105	A	T	FALSE	TOLERATED	low	neutral	Neutral
rs1441776298	106	E	G	FALSE	TOLERATED	low	neutral	Neutral
rs771212359	107	L	P	FALSE	TOLERATED	low	deleterious	Neutral
rs146240930	108	V	I	FALSE	TOLERATED	low	neutral	Neutral
rs376111476	109	P	R	FALSE	TOLERATED	low	deleterious	Neutral
rs1318474214	109	P	T	FALSE	TOLERATED	low	neutral	Neutral
rs774175271	111	G	D	FALSE	TOLERATED	low	deleterious	Neutral
rs138060061	112	E	K	FALSE	TOLERATED	low	deleterious	Neutral
rs765995054	113	D	Y	FALSE	TOLERATED	low	deleterious	Neutral
rs149511633	114	D	Y	FALSE	TOLERATED	low	deleterious	Neutral
rs1344156792	114	D	G	FALSE	TOLERATED	neutral	neutral	Neutral
rs754515726	115	S	C	FALSE	DAMAGING	low	deleterious	Neutral
rs1409679977	116	E	G	FALSE	TOLERATED	low	neutral	Neutral
rs778439116	117	Y	N	FALSE	TOLERATED	neutral	neutral	Neutral
rs367705147	119	E	Q	FALSE	TOLERATED	neutral	neutral	Neutral
rs1312331591	120	R	T	FALSE	TOLERATED	neutral	neutral	Neutral
rs143923741	121	D	E	FALSE	TOLERATED	low	neutral	Neutral
rs891811489	121	D	G	FALSE	TOLERATED	low	neutral	Neutral
rs781466360	122	A	T	FALSE	TOLERATED	neutral	neutral	Neutral			1
rs148643053	122	A	D	FALSE	TOLERATED	neutral	neutral	Neutral
rs144176325	123	P	H	FALSE	TOLERATED	low	deleterious	Neutral
rs201231951	123	P	T	FALSE	TOLERATED	low	neutral	Neutral
rs761727771	126	D	V	FALSE	TOLERATED	neutral	neutral	Neutral
rs772036751	127	A	G	FALSE	TOLERATED	low	deleterious	Neutral
rs1263298527	127	A	P	FALSE	TOLERATED	neutral	neutral	Neutral
rs1381354958	128	G	E	FALSE	TOLERATED	neutral	neutral	Neutral
rs1160867641	128	G	W	FALSE	DAMAGING	low	deleterious	Neutral
rs935317810	130	W	C	TRUE	DAMAGING	low	deleterious	Deleterious
rs772930057	132	R	C	FALSE	DAMAGING	neutral	neutral	Deleterious
rs147360797	132	R	H	TRUE	DAMAGING	neutral	neutral	Deleterious
rs766124017	134	S	T	FALSE	TOLERATED	low	deleterious	Neutral
rs1475323153	134	S	G	FALSE	TOLERATED	low	neutral	Neutral
rs576426897	134	S	R	FALSE	TOLERATED	neutral	neutral	Neutral
rs1433122185	135	F	L	TRUE	DAMAGING	low	neutral	Deleterious
rs376883757	135	F	C	TRUE	DAMAGING	low	deleterious	Deleterious
rs1361253888	136	G	D	TRUE	DAMAGING	low	deleterious	Deleterious
rs1402464725	137	L	F	TRUE	DAMAGING	medium	deleterious	Deleterious
rs367973565	140	S	G	TRUE	DAMAGING	medium	deleterious	Deleterious
rs113905789	141	V	I	FALSE	TOLERATED	neutral	neutral	Neutral
rs1368452537	142	W	R	FALSE	TOLERATED	low	neutral	Neutral
rs375672112	145	D	V	TRUE	TOLERATED	low	neutral	Deleterious
rs750916537	145	D	N	FALSE	TOLERATED	low	deleterious	Neutral
rs1266819321	147	S	C	TRUE	DAMAGING	medium	deleterious	Neutral
rs760384701	151	K	T	FALSE	TOLERATED	medium	deleterious	Neutral
rs529862780	152	A	V	TRUE	TOLERATED	medium	deleterious	Neutral
rs748241378	152	A	T	TRUE	TOLERATED	medium	deleterious	Neutral
rs1295784741	153	N	D	TRUE	TOLERATED	medium	deleterious	Neutral
rs548048744	154	K	N	TRUE	TOLERATED	medium	deleterious	Neutral
rs563813073	155	R	K	TRUE	TOLERATED	neutral	neutral	Neutral
rs140177918	155	R	S	FALSE	TOLERATED	low	deleterious	Neutral
rs776403811	155	R	W	TRUE	DAMAGING	low	deleterious	Deleterious
rs754246529	157	D	A	TRUE	TOLERATED	medium	deleterious	Deleterious
rs373443253	157	D	H	TRUE	TOLERATED	medium	deleterious	Deleterious
rs1461255276	158	W	R	TRUE	TOLERATED	medium	deleterious	Deleterious
rs1259186405	158	W	C	TRUE	DAMAGING	medium	deleterious	Deleterious
rs755208117	158	W	S	TRUE	TOLERATED	medium	deleterious	Deleterious
rs779165594	159	R	G	TRUE	TOLERATED	low	deleterious	Deleterious
rs1309601828	160	D	G	TRUE	TOLERATED	medium	deleterious	Deleterious
rs953032492	162	S	T	FALSE	TOLERATED	neutral	neutral	Neutral
rs758528617	163	P	T	TRUE	TOLERATED	medium	deleterious	Deleterious
rs570901958	163	P	L	TRUE	TOLERATED	medium	deleterious	Deleterious
rs1354214807	164	R	S	TRUE	TOLERATED	medium	deleterious	Deleterious
rs1214872050	164	R	K	TRUE	TOLERATED	medium	deleterious	Neutral
rs765640197	167	L	P	TRUE	DAMAGING	medium	deleterious	Deleterious
rs764268204	168	H	Q	FALSE	TOLERATED	low	deleterious	Neutral
rs763282940	168	H	R	FALSE	TOLERATED	low	neutral	Deleterious
rs145710337	168	H	Y	FALSE	TOLERATED	neutral	neutral	Neutral
rs751739930	169	F	V	FALSE	TOLERATED	medium	deleterious	Deleterious
rs987423802	169	F	L	FALSE	TOLERATED	low	deleterious	Deleterious
rs757347870	169	F	C	FALSE	DAMAGING	medium	deleterious	Deleterious
rs781186952	170	G	A	FALSE	TOLERATED	low	deleterious	Neutral
rs750375623	171	G	D	FALSE	TOLERATED	low	deleterious	Neutral
rs1187054931	172	G	S	TRUE	TOLERATED	low	deleterious	Neutral
rs1322118735	173	G	S	TRUE	TOLERATED	low	deleterious	Neutral
rs373334374	173	G	D	TRUE	TOLERATED	low	deleterious	Neutral
rs749017361	175	L	M	TRUE	DAMAGING	medium	deleterious	Neutral
rs1395357328	176	A	E	FALSE	TOLERATED	low	deleterious	Neutral
rs1436221872	179	N	I	TRUE	TOLERATED	medium	deleterious	Deleterious
rs768466602	180	C	F	TRUE	TOLERATED	medium	deleterious	Deleterious
rs201335395	180	C	R	TRUE	TOLERATED	medium	deleterious	Deleterious
rs1453779249	181	Q	H	TRUE	TOLERATED	low	deleterious	Neutral
rs1374323050	181	Q	R	FALSE	TOLERATED	low	neutral	Neutral
rs778744059	183	S	F	FALSE	TOLERATED	low	deleterious	Deleterious
rs940131187	184	W	C	TRUE	DAMAGING	medium	deleterious	Deleterious
rs1364689917	186	S	P	FALSE	TOLERATED	low	neutral	Neutral
rs758619786	188	P	A	FALSE	TOLERATED	low	neutral	Deleterious
rs1435980693	188	P	L	FALSE	TOLERATED	low	neutral	Deleterious
rs747033715	189	V	E	FALSE	TOLERATED	low	neutral	Neutral
rs1347324504	192	P	A	TRUE	TOLERATED	medium	deleterious	Neutral
rs751790662	194	C	Y	TRUE	TOLERATED	neutral	deleterious	Neutral
rs764392849	194	C	R	TRUE	TOLERATED	neutral	neutral	Neutral
rs761953619	195	D	N	TRUE	DAMAGING	high	deleterious	Deleterious
rs148745569	196	I	S	TRUE	TOLERATED	medium	deleterious	Deleterious
rs572007284	197	L	M	TRUE	TOLERATED	medium	deleterious	Neutral
rs779828023	199	E	D	FALSE	TOLERATED	low	deleterious	Neutral
rs754841831	203	R	Q	TRUE	TOLERATED	medium	deleterious	Neutral
rs376850594	204	G	R	TRUE	TOLERATED	low	deleterious	Neutral
rs537710953	205	Q	L	TRUE	TOLERATED	neutral	deleterious	Deleterious
rs868350894	206	A	S	TRUE	TOLERATED	medium	deleterious	Neutral
rs1190572102	208	E	Q	FALSE	TOLERATED	low	deleterious	Neutral
rs1443551845	211	G	V	FALSE	TOLERATED	low	deleterious	Neutral
rs1248353855	217	C	S	TRUE	TOLERATED	low	neutral	Deleterious
rs1346168633	218	Y	C	TRUE	DAMAGING	medium	deleterious	Deleterious
rs968421309	218	Y	H	TRUE	TOLERATED	medium	deleterious	Neutral
rs1202242071	219	T	A	TRUE	TOLERATED	neutral	deleterious	Neutral
rs775883526	219	T	R	TRUE	DAMAGING	medium	deleterious	Deleterious
rs749732822	221	L	P	TRUE	DAMAGING	high	deleterious	Deleterious
rs1208034064	222	D	E	TRUE	DAMAGING	medium	deleterious	Deleterious
rs774690430	224	R	T	TRUE	TOLERATED	neutral	deleterious	Neutral
rs1344422522	225	Y	S	TRUE	TOLERATED	medium	deleterious	Deleterious
rs762078262	228	G	R	TRUE	DAMAGING	high	deleterious	Deleterious
rs1022701605	229	L	P	TRUE	DAMAGING	medium	deleterious	Deleterious
rs1418662754	230	G	E	TRUE	DAMAGING	high	deleterious	Deleterious
rs755521540	231	N	K	TRUE	DAMAGING	high	deleterious	Deleterious
rs780669898	233	I	T	TRUE	DAMAGING	medium	deleterious	Deleterious
rs748605862	234	K	Q	TRUE	DAMAGING	medium	deleterious	Deleterious
rs1341969187	236	E	Q	TRUE	DAMAGING	high	deleterious	Deleterious
rs200944726	237	A	D	FALSE	DAMAGING	high	deleterious	Deleterious
rs778136656	238	L	F	TRUE	DAMAGING	high	deleterious	Deleterious
rs201377798	239	Y	C	TRUE	DAMAGING	medium	deleterious	Deleterious
rs759717925	240	R	G	FALSE	DAMAGING	medium	deleterious	Deleterious
rs1423848378	241	A	S	TRUE	TOLERATED	low	deleterious	Neutral
rs769943029	241	A	G	TRUE	DAMAGING	high	deleterious	Deleterious
rs566694214	242	G	E	FALSE	DAMAGING	medium	deleterious	Neutral
rs1422704375	242	G	R	FALSE	TOLERATED	neutral	neutral	Neutral
rs371841681	244	H	R	TRUE	DAMAGING	medium	deleterious	Deleterious
rs533726552	244	H	Y	TRUE	DAMAGING	medium	deleterious	Deleterious
rs1199384098	245	P	R	TRUE	DAMAGING	high	deleterious	Deleterious
rs751355466	245	P	A	TRUE	DAMAGING	high	deleterious	Deleterious
rs767128371	246	L	V	FALSE	TOLERATED	medium	deleterious	Neutral
rs777038352	246	L	P	TRUE	DAMAGING	medium	deleterious	Deleterious
rs138259101	249	G	S	TRUE	TOLERATED	low	deleterious	Neutral
rs779482420	249	G	D	TRUE	TOLERATED	medium	deleterious	Deleterious
rs753211817	250	S	L	TRUE	DAMAGING	medium	deleterious	Deleterious
rs778060356	251	V	A	FALSE	TOLERATED	neutral	neutral	Neutral
rs758943337	251	V	I	FALSE	TOLERATED	neutral	neutral	Neutral
rs143580228	253	S	N	FALSE	TOLERATED	low	deleterious	Neutral
rs781583476	253	S	G	FALSE	TOLERATED	low	neutral	Neutral
rs1441348632	253	S	R	FALSE	TOLERATED	low	deleterious	Neutral
rs267601736	254	A	V	FALSE	TOLERATED	low	neutral	Neutral
rs1305259695	255	S	L	FALSE	TOLERATED	low	neutral	Neutral
rs762855900	256	R	C	FALSE	DAMAGING	medium	neutral	Deleterious
rs148057216	256	R	H	FALSE	DAMAGING	low	neutral	Neutral
rs8191664	257	R	Q	TRUE	TOLERATED	neutral	deleterious	Neutral
rs761700950	257	R	W	FALSE	TOLERATED	neutral	deleterious	Neutral
rs537850638	260	L	P	TRUE	DAMAGING	high	deleterious	Deleterious
rs1255185930	261	V	G	TRUE	DAMAGING	medium	deleterious	Deleterious
rs753379134	263	H	Y	FALSE	DAMAGING	low	deleterious	Neutral
rs758881167	263	H	R	FALSE	TOLERATED	low	deleterious	Neutral
rs954952038	264	V	M	TRUE	DAMAGING	low	deleterious	Neutral
rs764634673	264	V	A	TRUE	DAMAGING	neutral	neutral	Neutral
rs781633089	266	E	D	FALSE	TOLERATED	low	deleterious	Neutral
rs556183329	266	E	A	FALSE	TOLERATED	neutral	neutral	Neutral
rs796115261	268	S	R	TRUE	TOLERATED	medium	deleterious	Deleterious
rs1438455230	268	S	T	FALSE	TOLERATED	low	deleterious	Neutral
rs756391464	269	T	I	FALSE	TOLERATED	low	neutral	Neutral
rs146342360	270	A	S	FALSE	TOLERATED	neutral	neutral	Neutral
rs749355131	270	A	V	FALSE	TOLERATED	neutral	neutral	Neutral
rs1253904140	272	L	M	TRUE	TOLERATED	medium	deleterious	Neutral
rs768579918	273	Q	H	FALSE	DAMAGING	neutral	neutral	Neutral
rs774368675	275	K	T	TRUE	TOLERATED	medium	deleterious	Deleterious
rs1251500318	278	G	S	FALSE	TOLERATED	low	deleterious	Neutral
rs915077987	278	G	D	FALSE	DAMAGING	low	neutral	Deleterious
rs771859753	279	R	T	FALSE	TOLERATED	neutral	neutral	Neutral
rs760381812	280	P	L	FALSE	TOLERATED	low	deleterious	Neutral
rs772990462	280	P	S	FALSE	TOLERATED	low	neutral	Neutral
rs765997060	282	H	R	TRUE	TOLERATED	low	neutral	Deleterious
rs776047147	283	T	I	FALSE	DAMAGING	low	neutral	Neutral
rs1457166887	283	T	P	FALSE	DAMAGING	low	neutral	Neutral
rs759106676	284	Q	E	FALSE	TOLERATED	medium	deleterious	Neutral
rs939078914	285	V	A	FALSE	DAMAGING	low	deleterious	Deleterious
rs1306901757	286	Y	F	TRUE	DAMAGING	medium	deleterious	Deleterious
rs764590524	289	E	A	FALSE	TOLERATED	medium	deleterious	Deleterious
rs200238029	291	C	R	TRUE	TOLERATED	medium	deleterious	Deleterious
rs757830126	291	C	Y	TRUE	DAMAGING	medium	deleterious	Deleterious
rs768051594	292	P	H	TRUE	DAMAGING	medium	deleterious	Deleterious
rs1465776802	294	G	S	TRUE	TOLERATED	medium	deleterious	Deleterious
rs144424540	297	V	F	FALSE	DAMAGING	medium	deleterious	Neutral
rs1417871033	298	M	T	FALSE	DAMAGING	low	neutral	Neutral
rs1203225452	298	M	I	FALSE	TOLERATED	low	neutral	Neutral
rs1485999906	300	E	D	TRUE	DAMAGING	neutral	neutral	Neutral
rs1274048711	300	E	K	FALSE	TOLERATED	low	neutral	Neutral
rs749424753	301	A	V	FALSE	TOLERATED	low	neutral	Neutral
rs1159730567	302	F	S	FALSE	TOLERATED	low	deleterious	Deleterious
rs748151885	303	G	E	TRUE	DAMAGING	medium	deleterious	Deleterious
rs528951528	303	G	R	TRUE	DAMAGING	medium	deleterious	Deleterious
rs8191666	304	P	T	FALSE	TOLERATED	medium	deleterious	Deleterious
rs139505292	305	E	K	FALSE	TOLERATED	neutral	neutral	Neutral
rs770676301	306	D	G	FALSE	TOLERATED	neutral	neutral	Neutral
rs776356628	307	G	R	FALSE	DAMAGING	low	deleterious	Neutral
rs1436029075	308	L	F	FALSE	DAMAGING	neutral	neutral	Neutral
rs899348939	310	R	G	TRUE	DAMAGING	medium	deleterious	Deleterious
rs1286688427	311	L	V	FALSE	TOLERATED	medium	neutral	Neutral
rs1296769479	312	T	N	TRUE	DAMAGING	medium	deleterious	Deleterious
rs1226461981	313	W	S	TRUE	DAMAGING	medium	deleterious	Deleterious
rs1367745247	313	W	R	TRUE	DAMAGING	medium	deleterious	Deleterious
rs1348760338	314	W	C	TRUE	DAMAGING	medium	deleterious	Deleterious
rs201996408	315	C	W	TRUE	DAMAGING	medium	deleterious	Deleterious
rs762458065	316	P	A	TRUE	DAMAGING	medium	deleterious	Deleterious
rs145018337	316	P	L	TRUE	DAMAGING	medium	deleterious	Deleterious
rs766597503	318	C	Y	TRUE	DAMAGING	medium	deleterious	Deleterious
rs148791384	320	P	H	TRUE	DAMAGING	medium	deleterious	Deleterious
rs755152581	320	P	S	TRUE	TOLERATED	low	neutral	Deleterious
rs1173313522	321	Q	P	FALSE	TOLERATED	low	deleterious	Neutral
rs201385939	323	S	L	FALSE	TOLERATED	neutral	neutral	Neutral
rs746888771	324	E	Q	FALSE	TOLERATED	low	neutral	Neutral
rs374129851	325	E	K	FALSE	TOLERATED	low	neutral	Neutral
rs780839981	327	E	Q	FALSE	TOLERATED	low	neutral	Neutral
rs770457534	328	Q	E	FALSE	TOLERATED	low	neutral	Neutral
rs745588492	328	Q	H	FALSE	TOLERATED	medium	neutral	Neutral
rs898438026	329	C	Y	FALSE	TOLERATED	neutral	neutral	Neutral
rs769307725	330	Q	H	FALSE	DAMAGING	medium	neutral	Neutral
rs775105824	331	F	L	FALSE	TOLERATED	neutral	neutral	Neutral
